# Supplementary material
Source: Springer Nature journal article supplement (https://www.springermedizin.de/resource/supplementary/13012_2011_537_MOESM8_ESM.pdf/9630152)

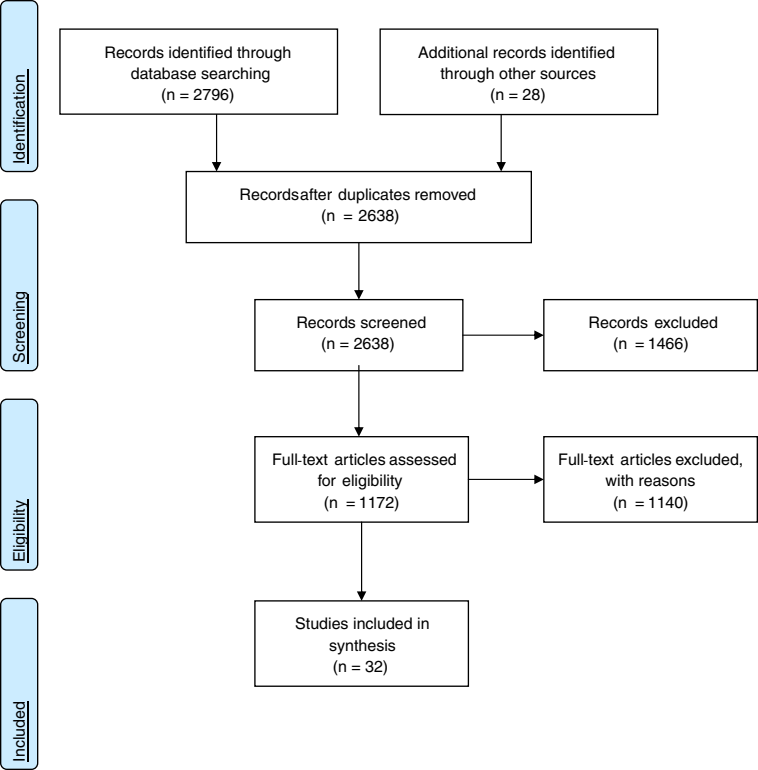

Supplement: MOESM8 [file 9630152]
